# Supplementary material for: Fast computational mutation-response scanning of proteins
Source: PeerJ journal article supplement (doi:10.7717/peerj.11330), 2021-04-21

# **Fast computational mutation-response scanning of proteins**

## **Supplementary figures**

Julian Echave\*

*Instituto de Ciencias Físicas, Escuela de Ciencia y Tecnología, Universidad Nacional de  
San Martín, Martín de Irigoyen 3100, 1650 San Martín, Buenos Aires, Argentina*

E-mail: [jechave@unsam.edu.ar](mailto:jechave@unsam.edu.ar)

The following pages contains figures similar to those of the main document for the other proteins of the dataset studied. See captions of main figures for details.

### Sensitivity matrix, d1lcka1

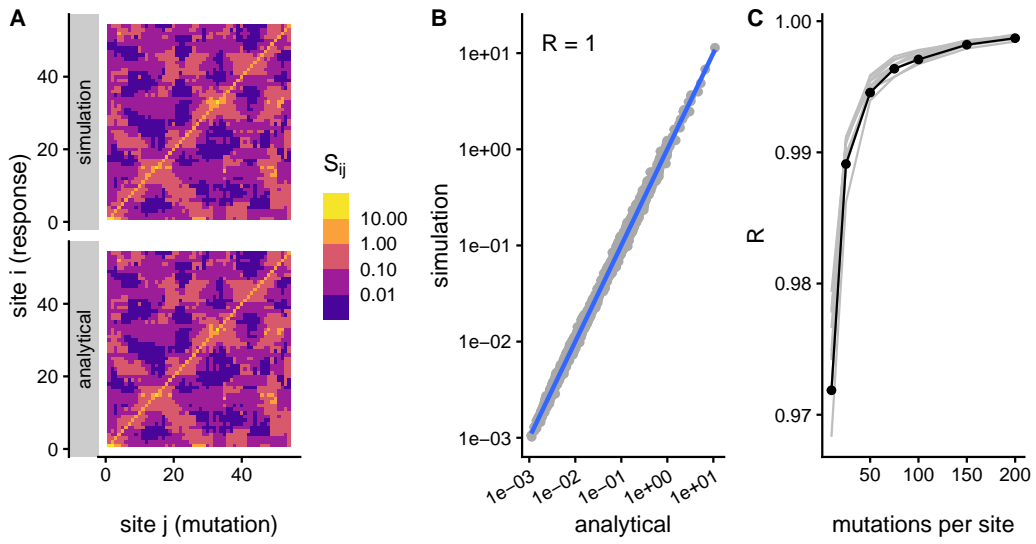

### Influence and sensitivity profiles, d1lcka1

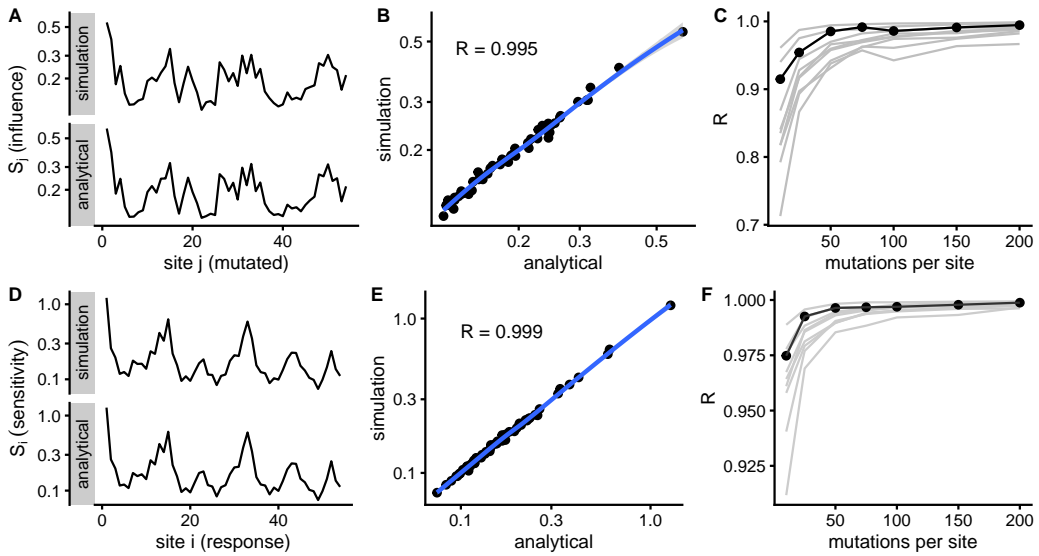

### Compensation matrix, d1lcka1

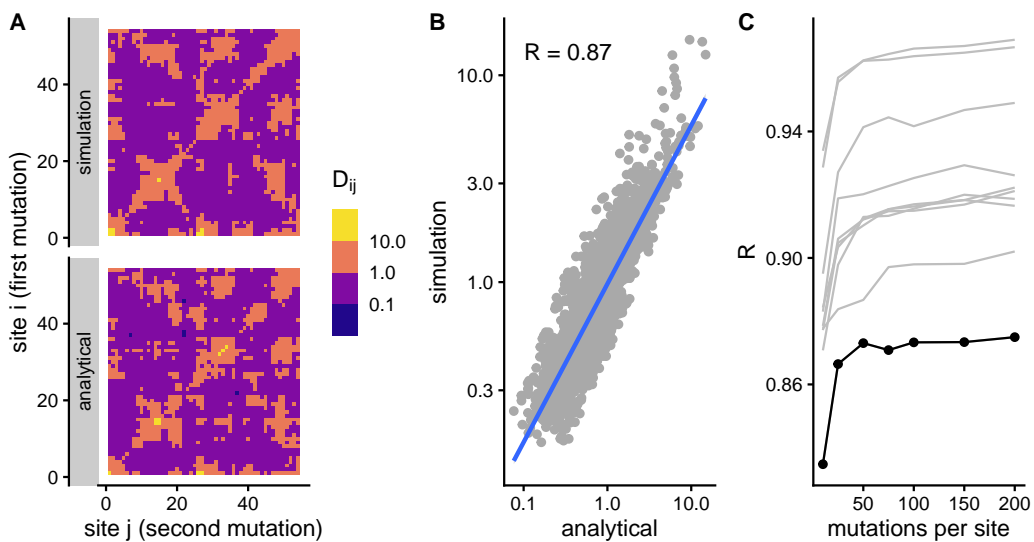

### Compensation profiles, d1lcka1

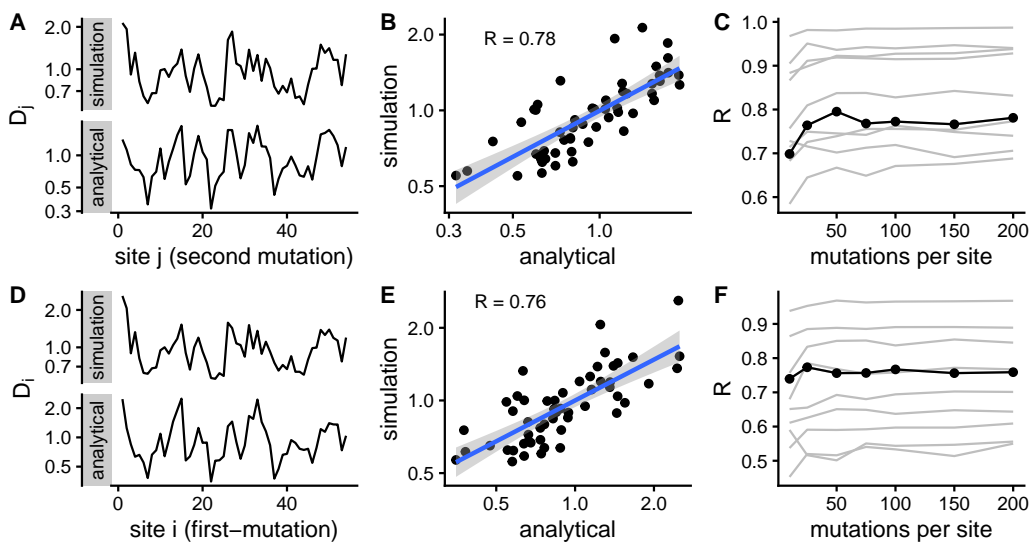

### Sensitivity matrix, d1ntxa

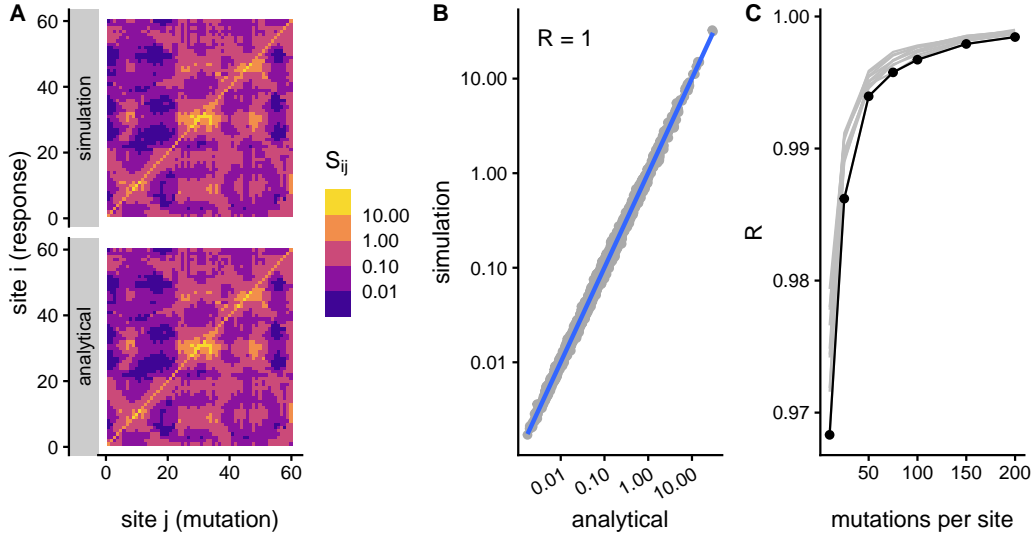

### Influence and sensitivity profiles, d1ntxa

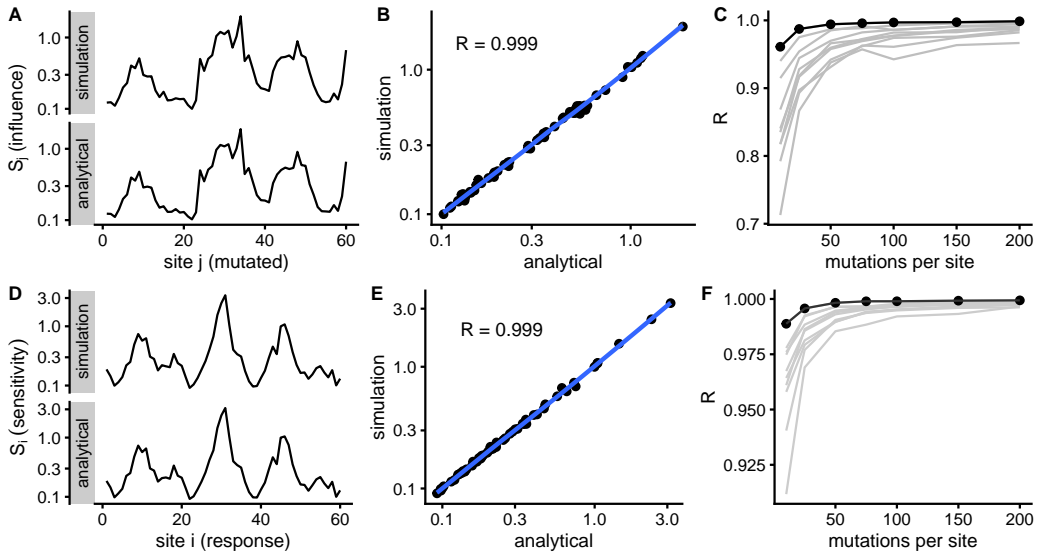

### Compensation matrix, d1ntxa

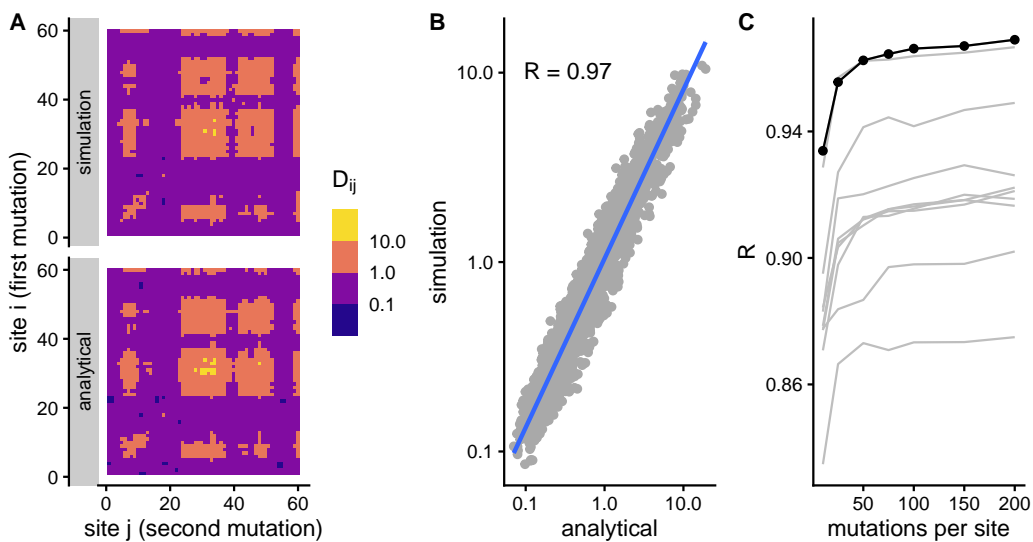

### Compensation profiles, d1ntxa

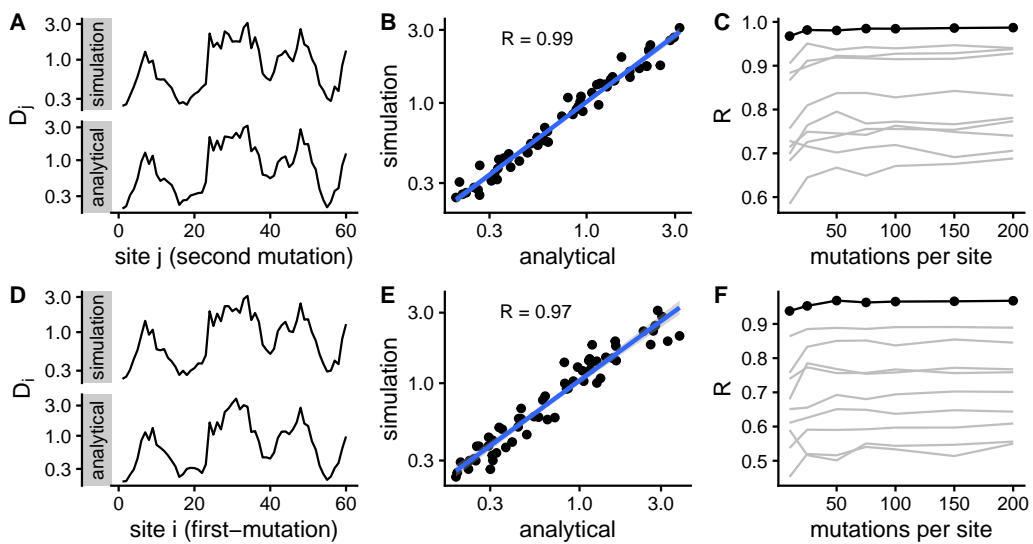

### Sensitivity matrix, d1fxla2

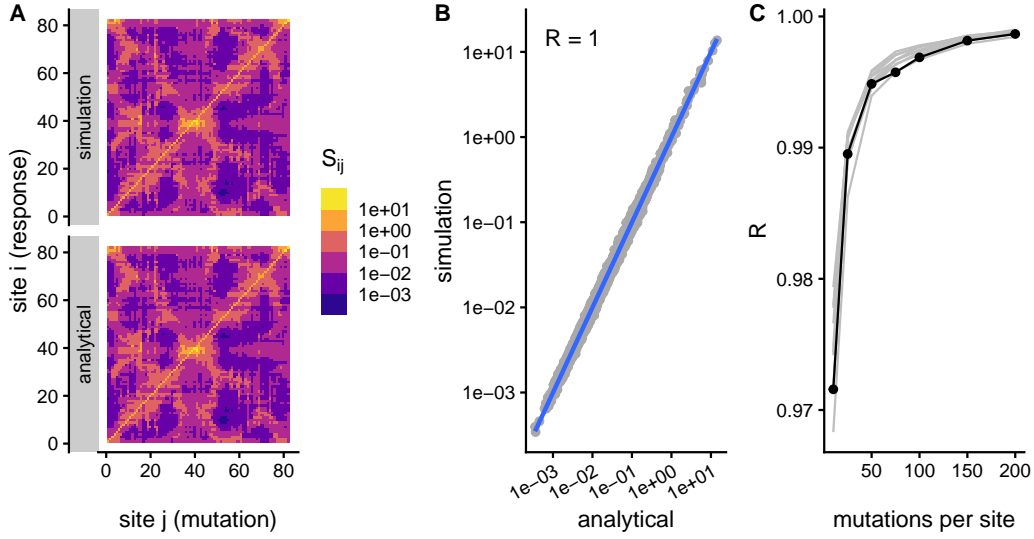

### Influence and sensitivity profiles, d1fxla2

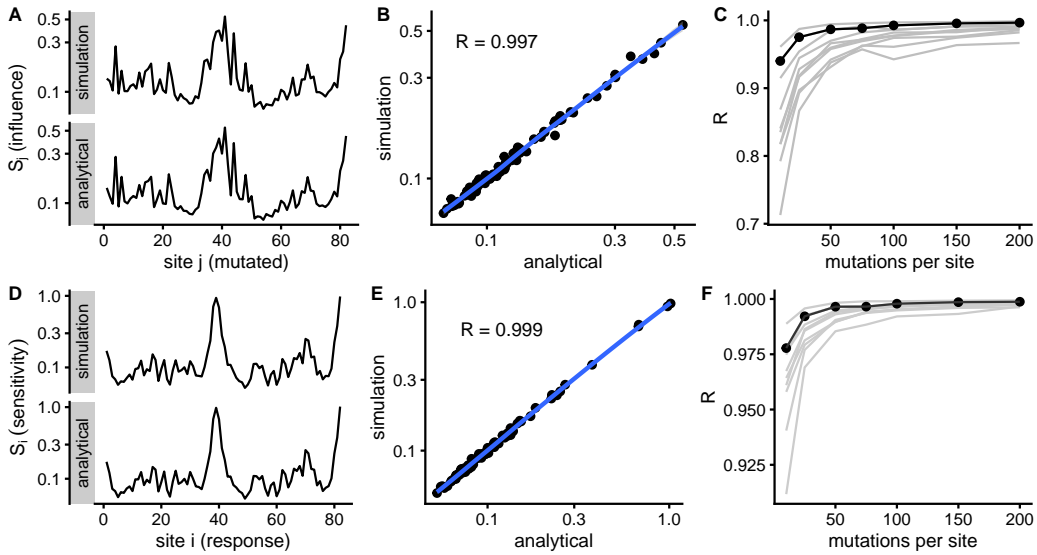

### Compensation matrix, d1fxla2

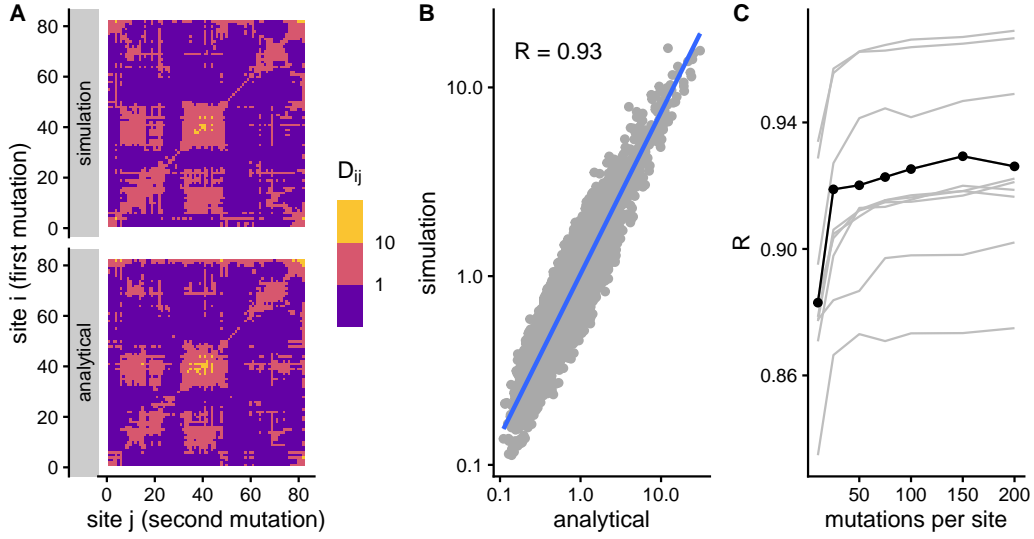

### Compensation profiles, d1fxla2

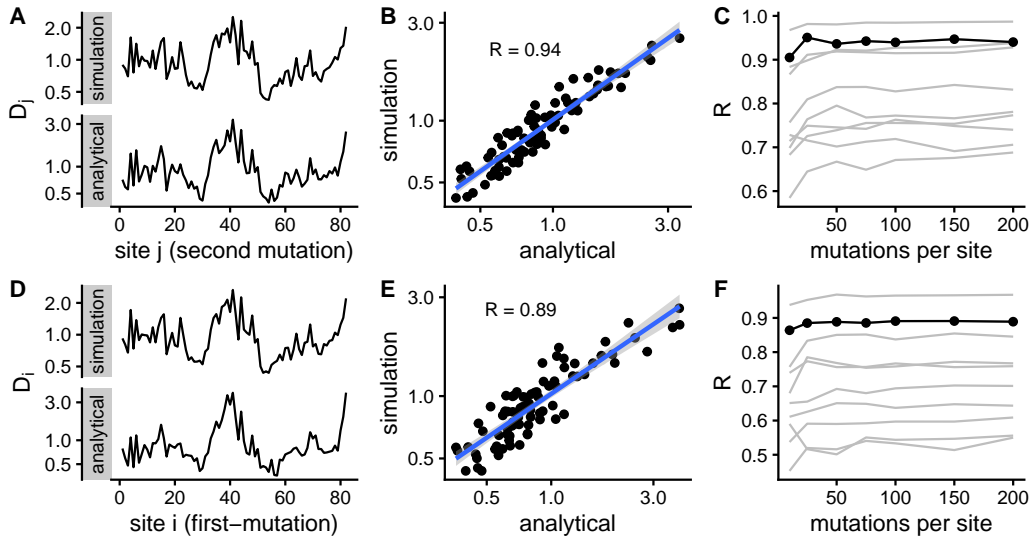

### Sensitivity matrix, d1bxva

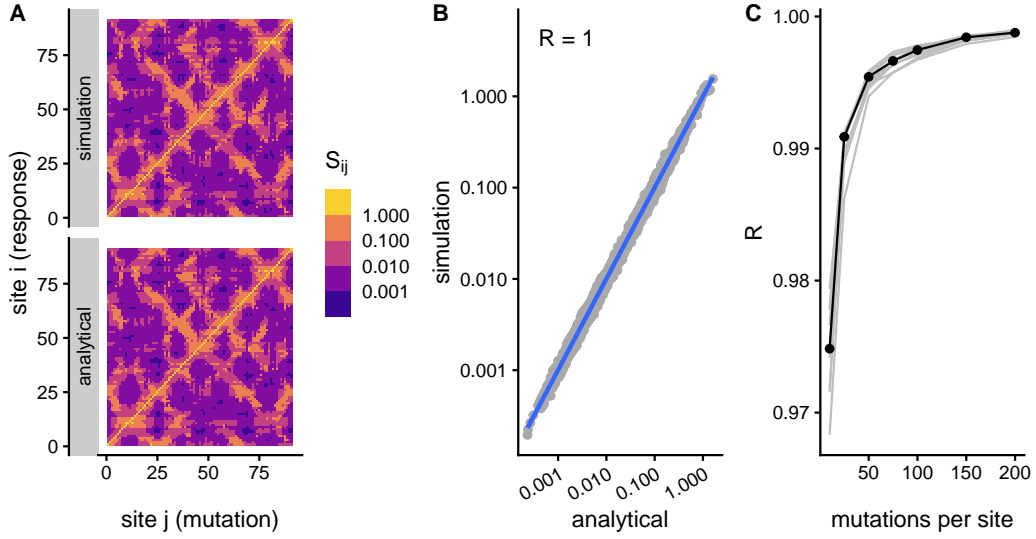

### Influence and sensitivity profiles, d1bxva

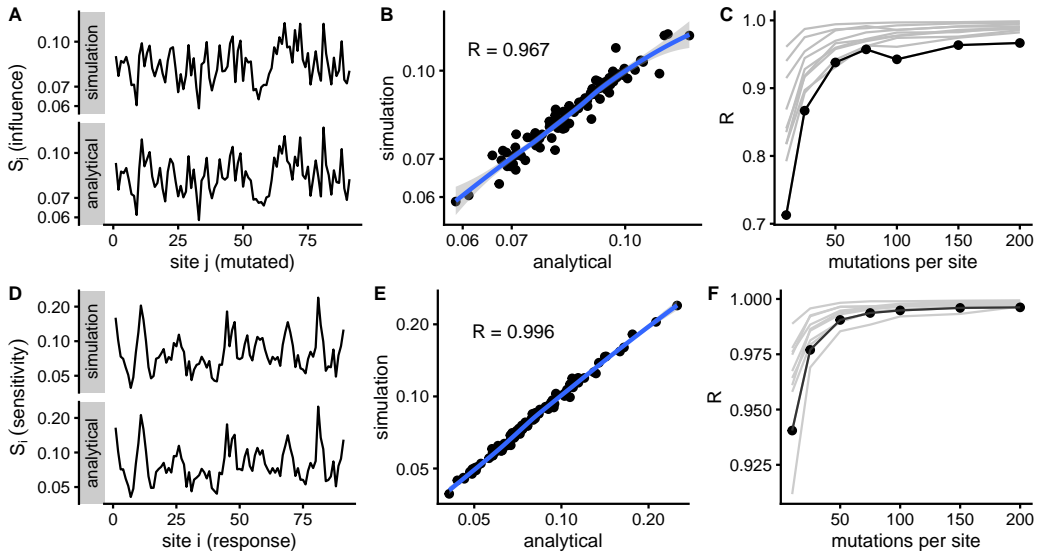



### Compensation matrix, d1bxva

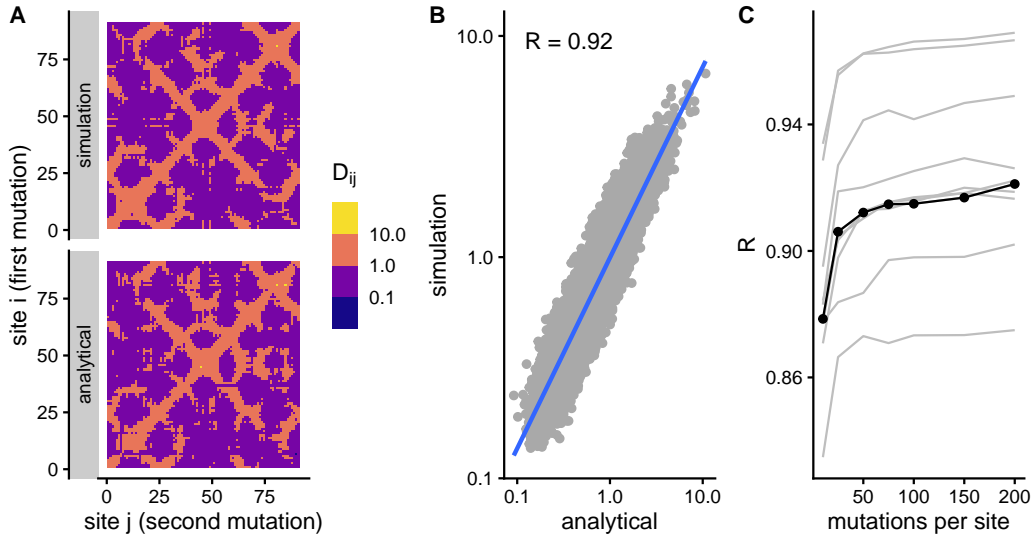

### Compensation profiles, d1bxva

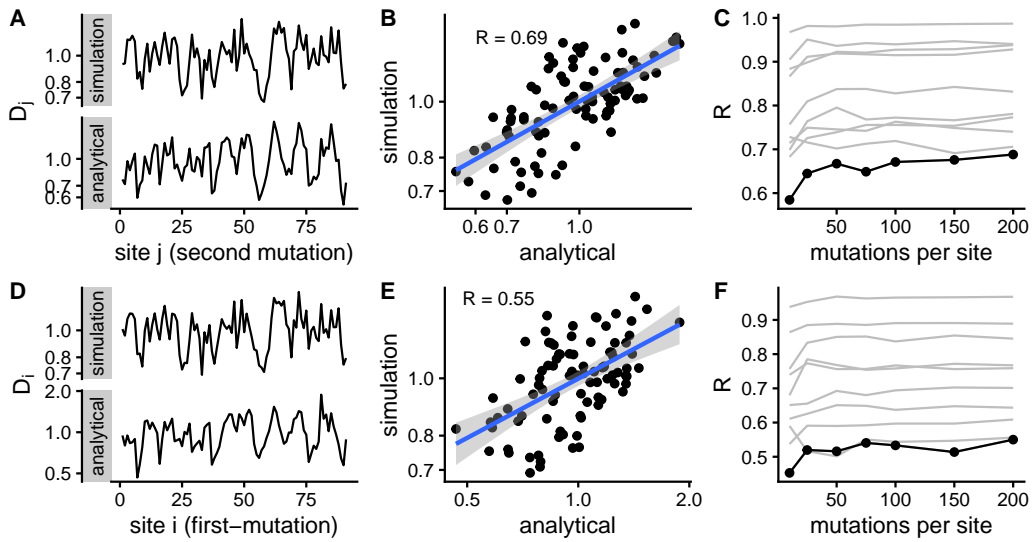

### Sensitivity matrix, d2acya

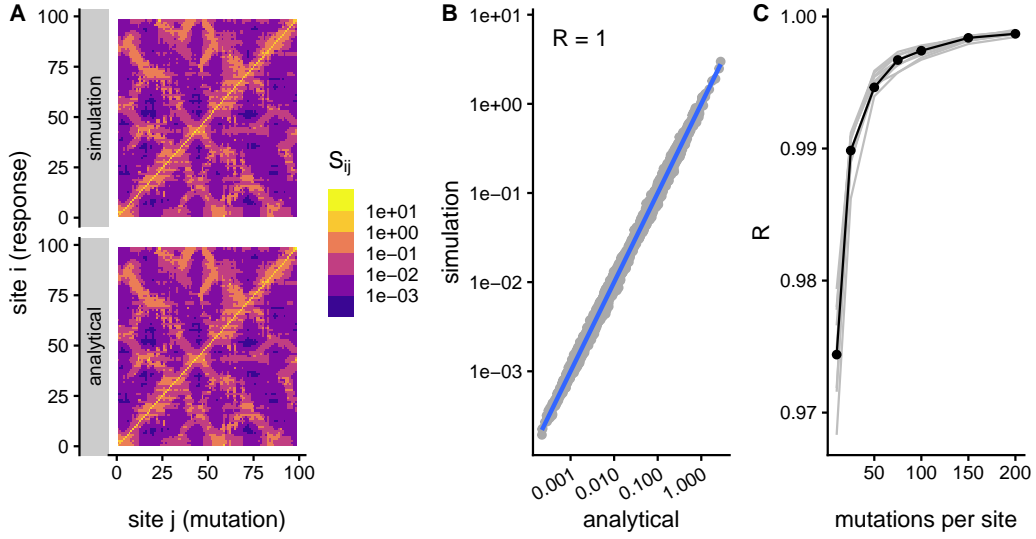

### Influence and sensitivity profiles, d2acya

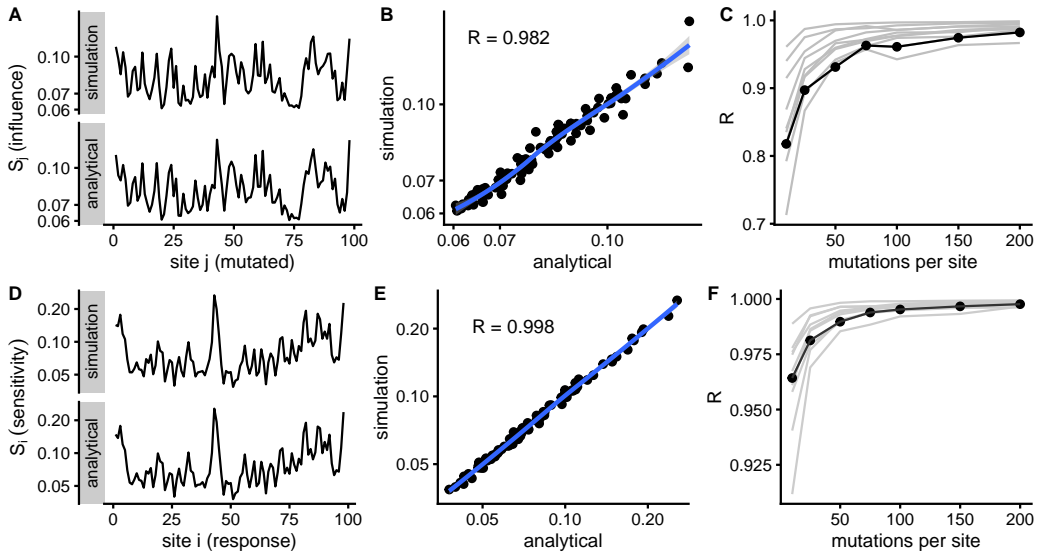

### Compensation matrix, d2acya

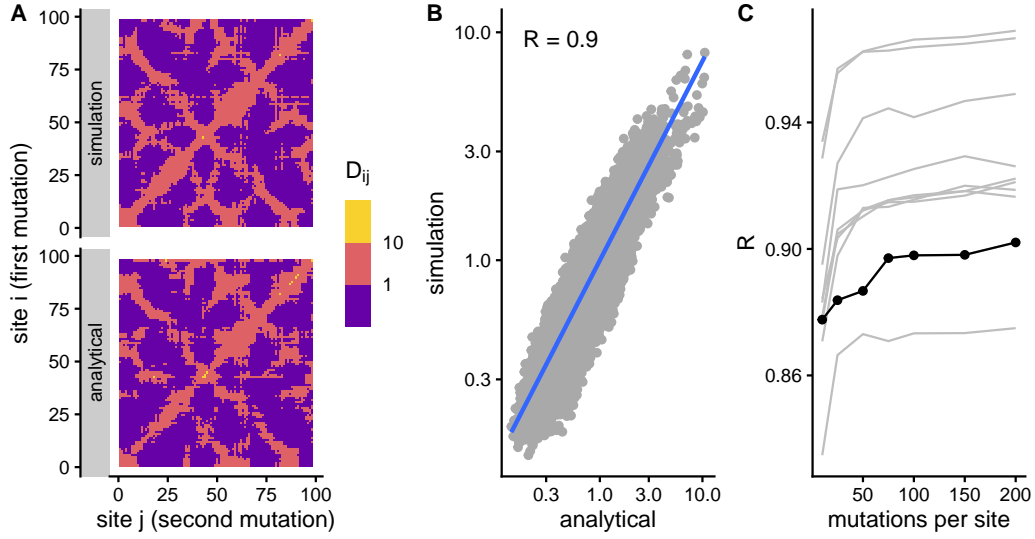

### Compensation profiles, d2acya

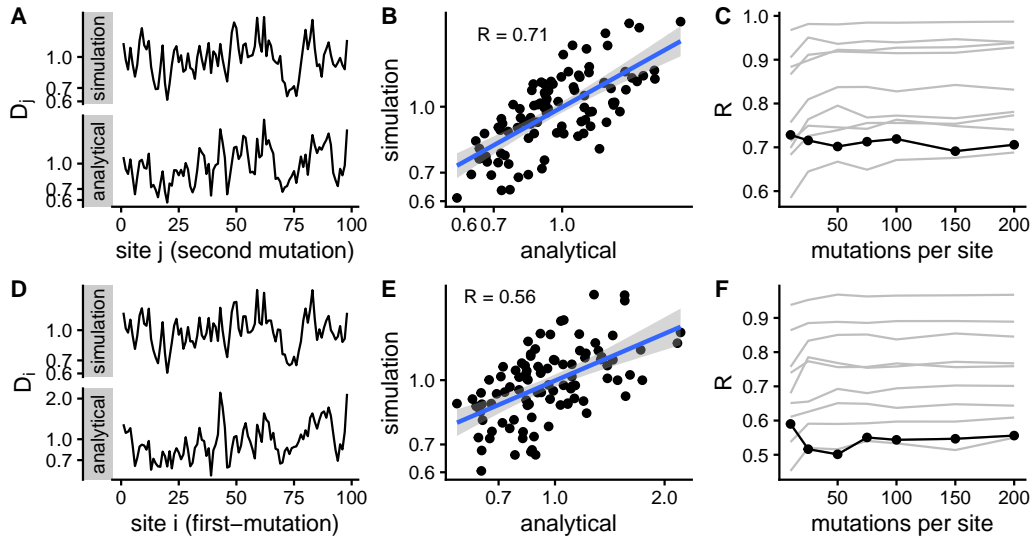

### Sensitivity matrix, d1hmta

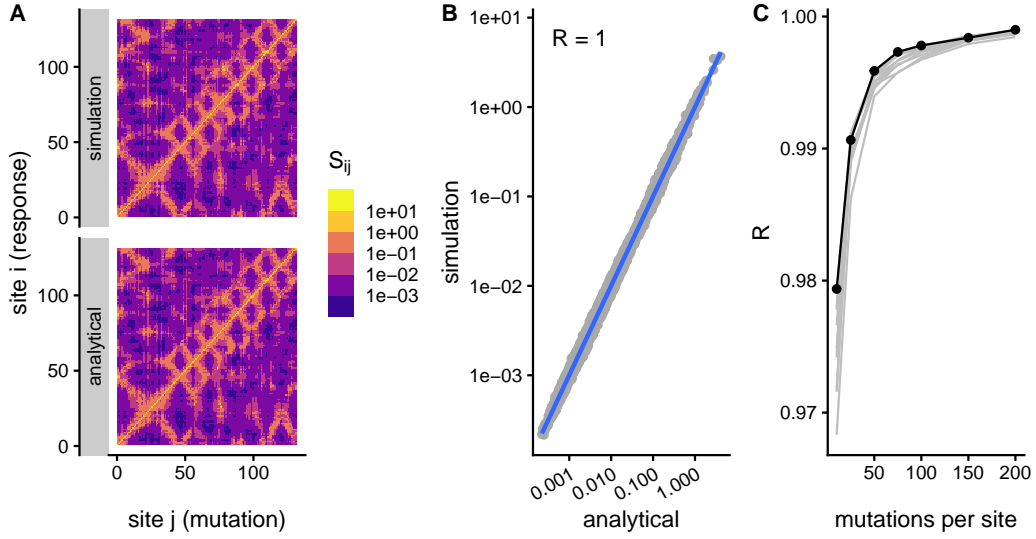

### Influence and sensitivity profiles, d1hmta

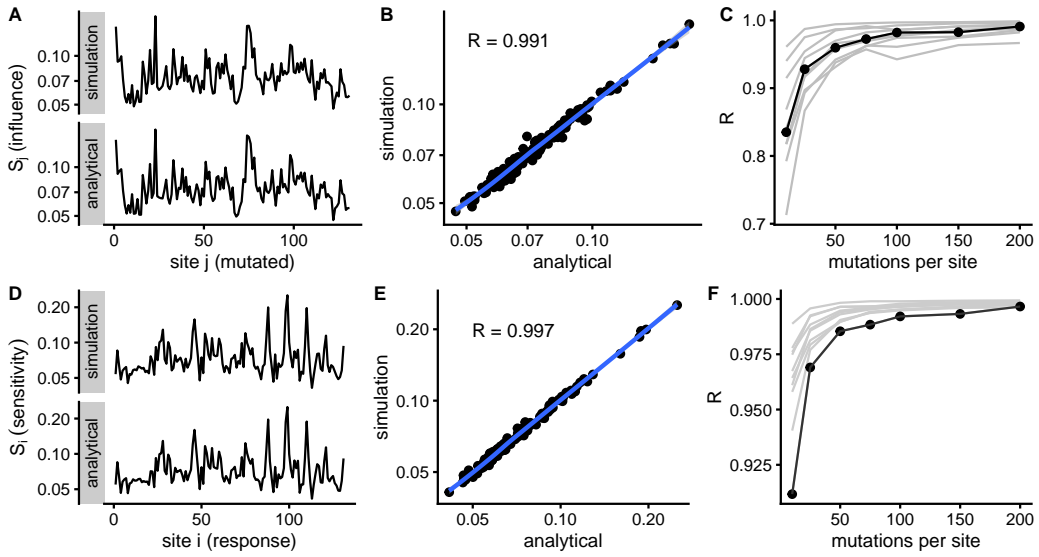

### Compensation matrix, d1hmta

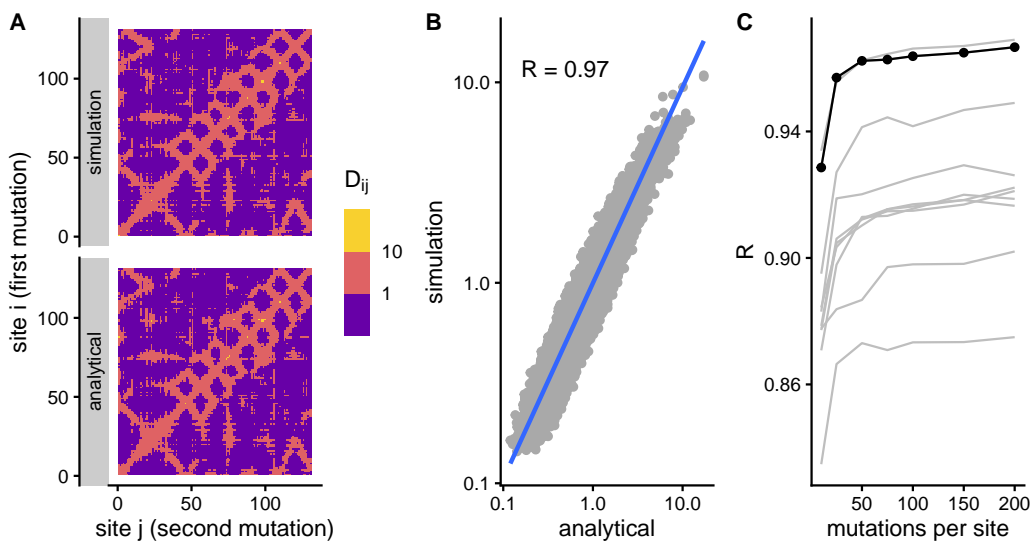

### Compensation profiles, d1hmta

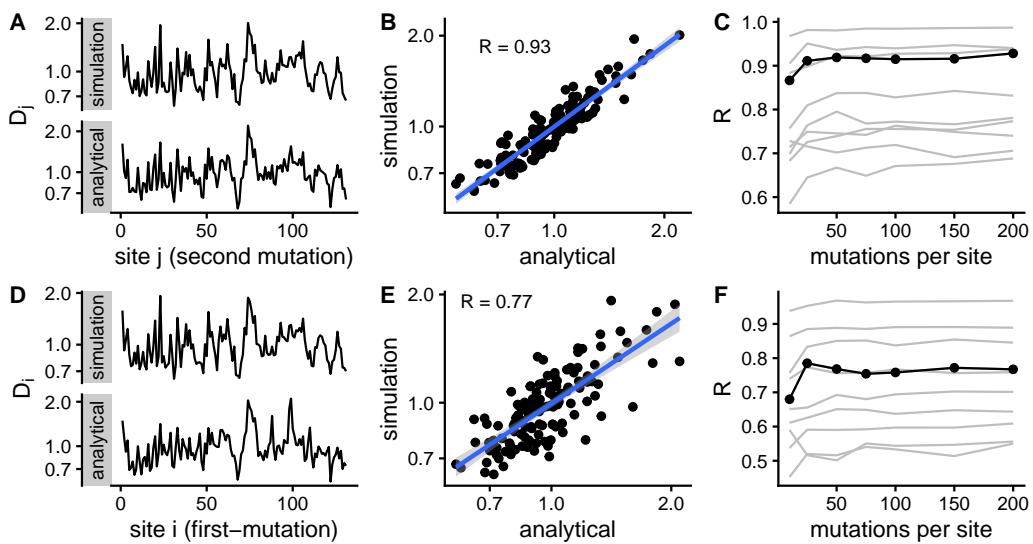

### Sensitivity matrix, d1a4fb

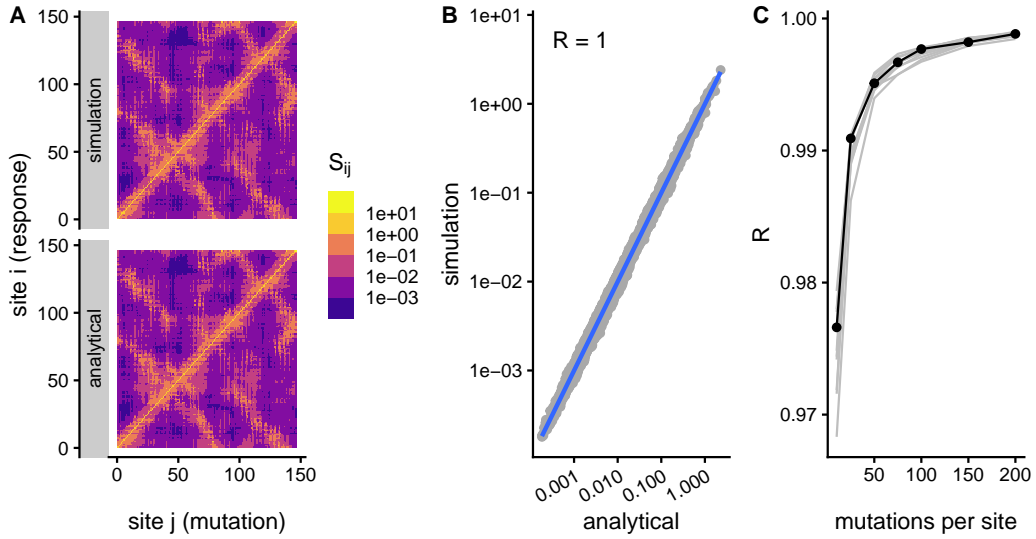

### Influence and sensitivity profiles, d1a4fb

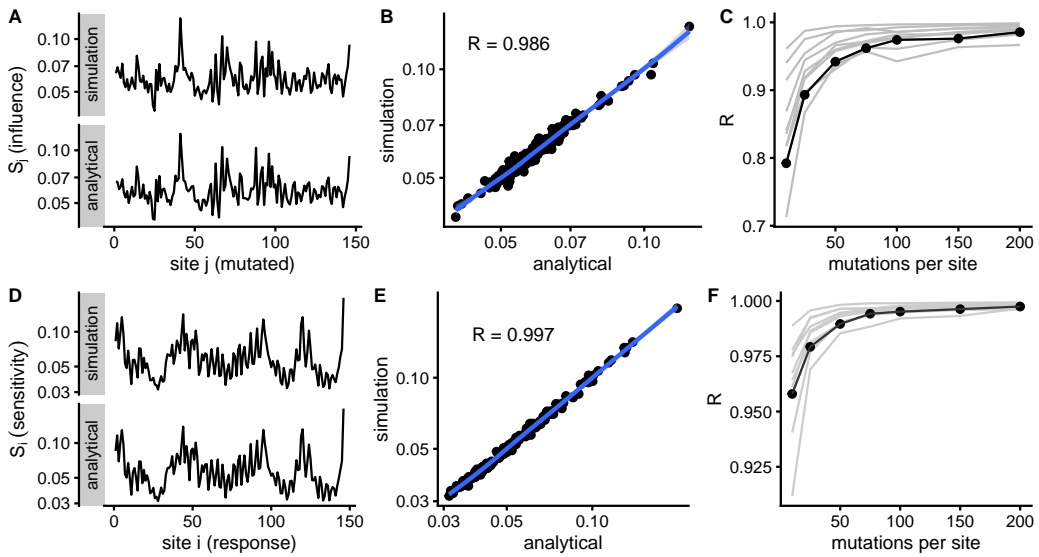

### Compensation matrix, d1a4fb

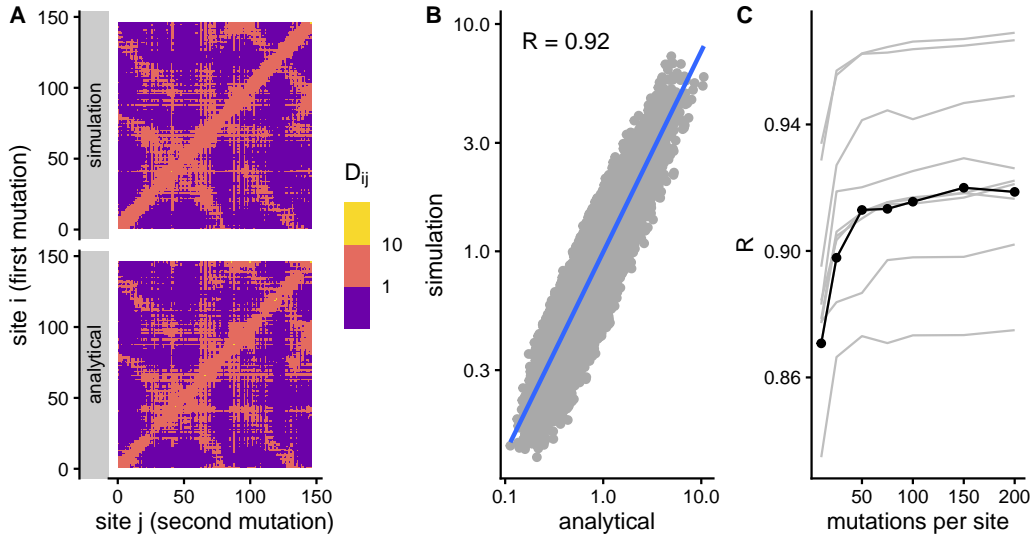

### Compensation profiles, d1a4fb

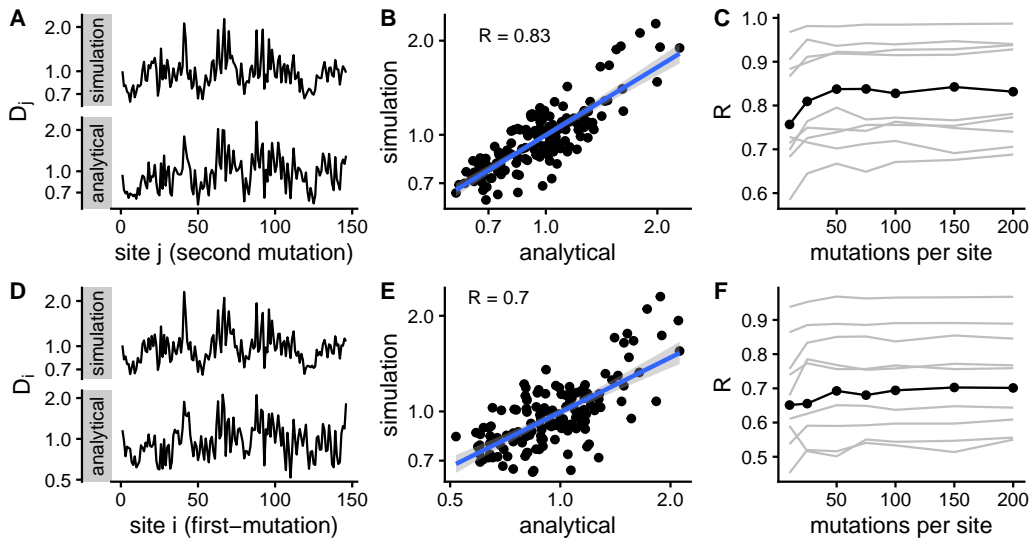

### Sensitivity matrix, d1mcta

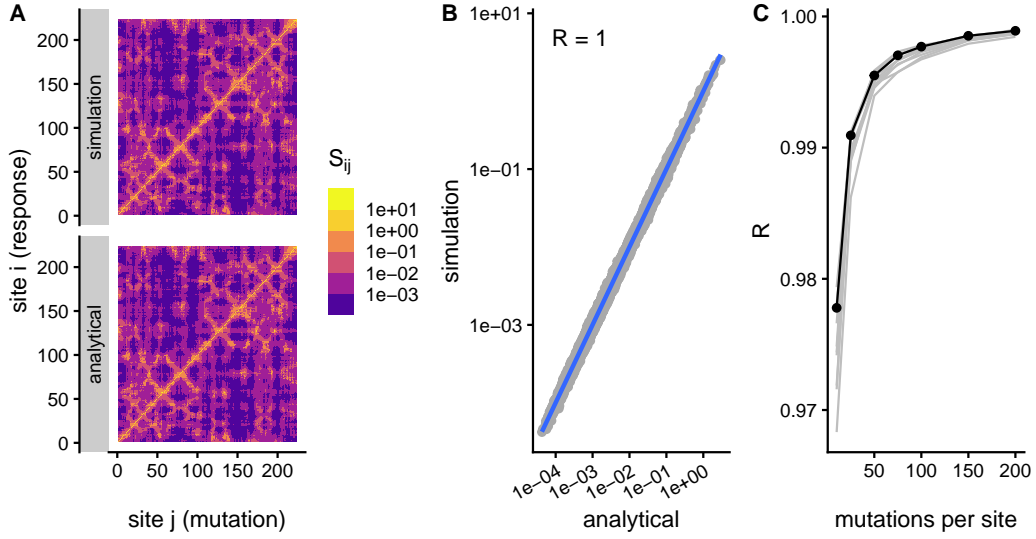

### Influence and sensitivity profiles, d1mcta

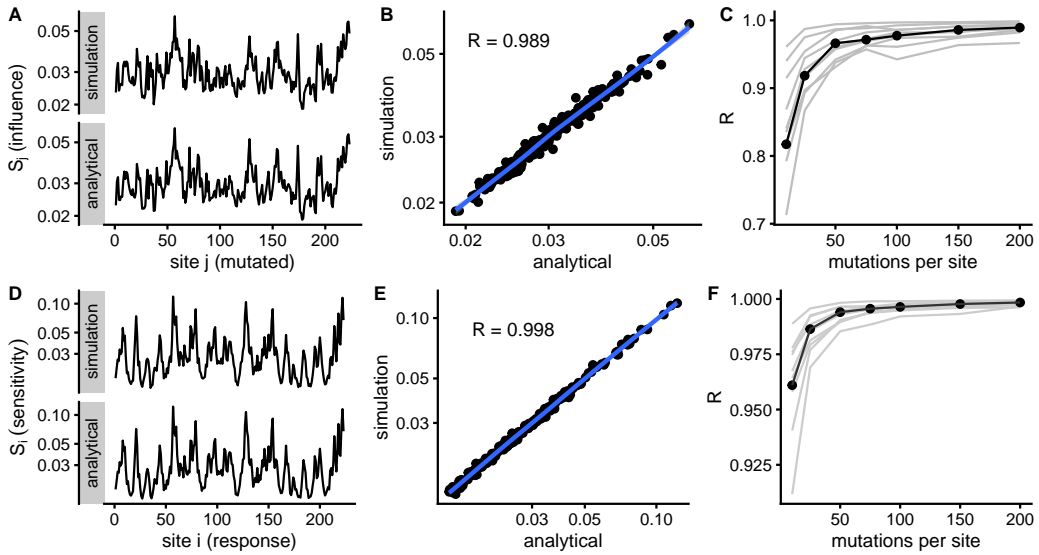



### Compensation matrix, d1mcta

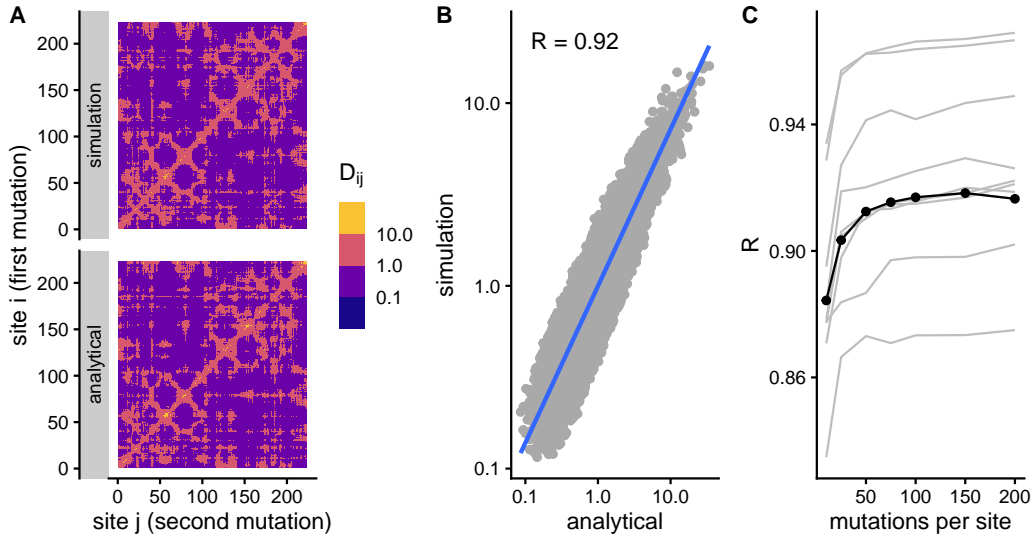

### Compensation profiles, d1mcta

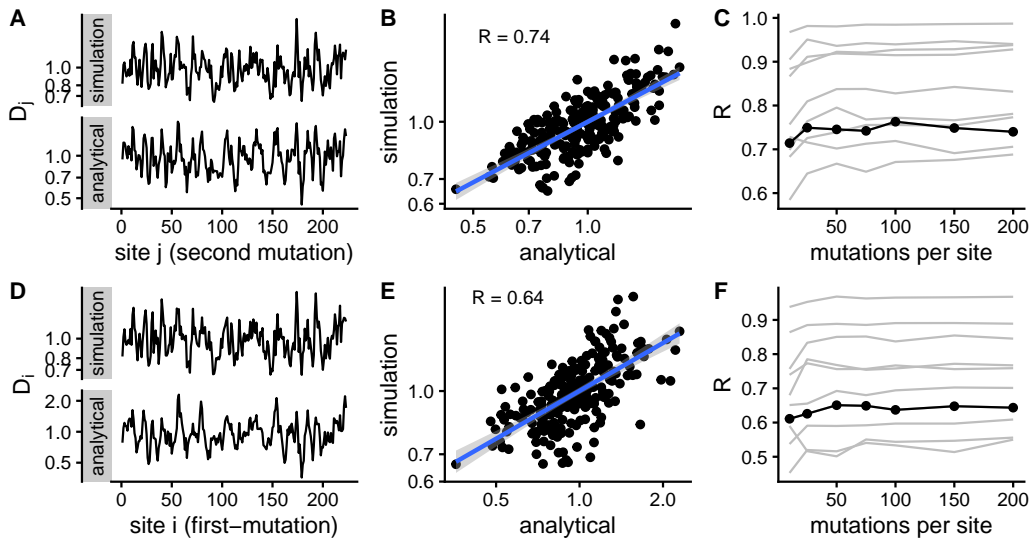

### Sensitivity matrix, d2l8ma

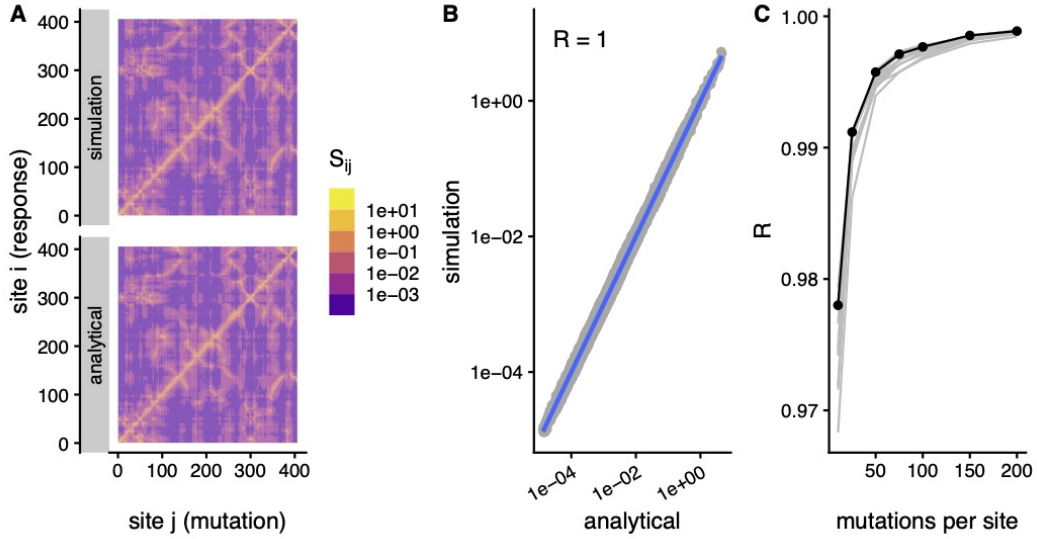

### Influence and sensitivity profiles, d2l8ma

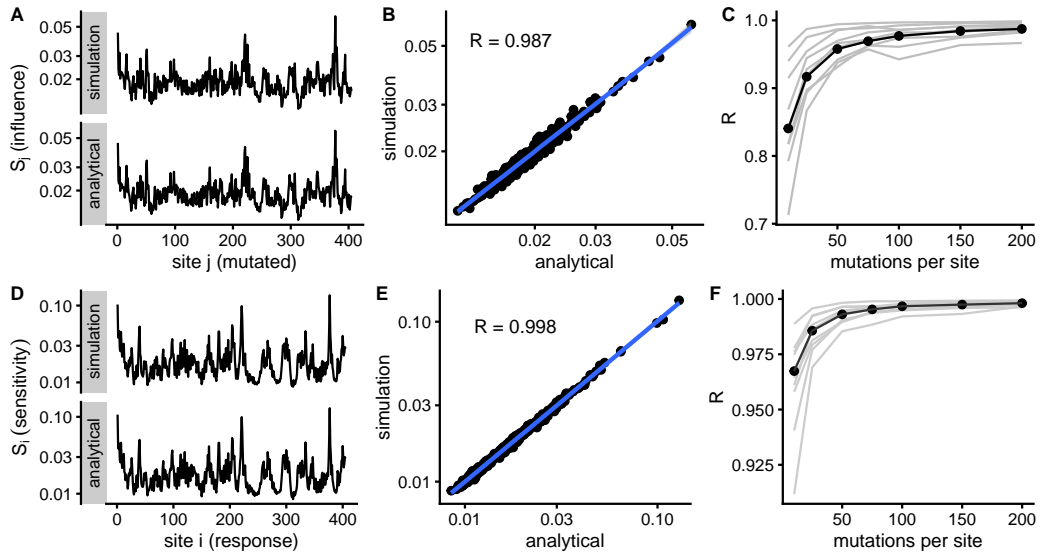

### Compensation matrix, d2l8ma

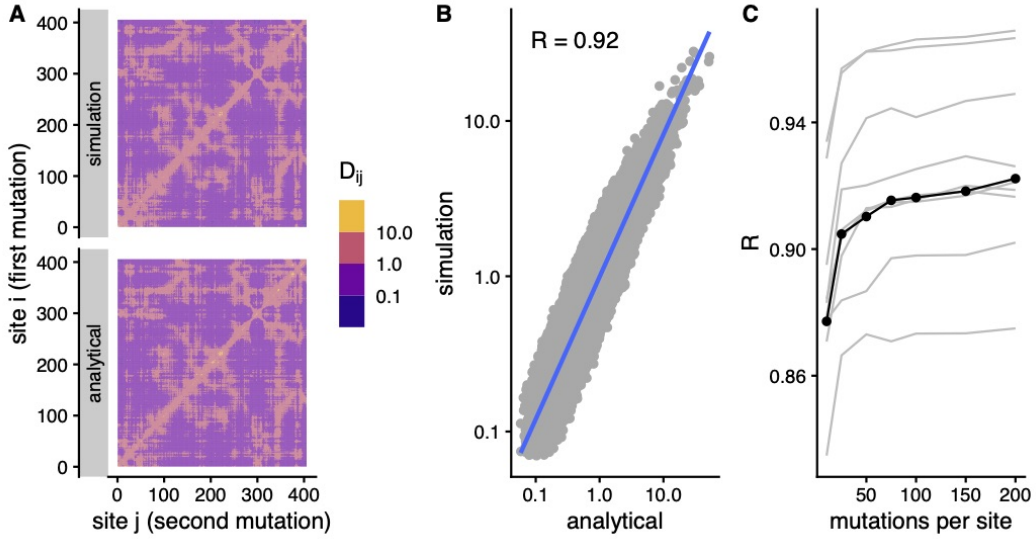

### Compensation profiles, d2l8ma

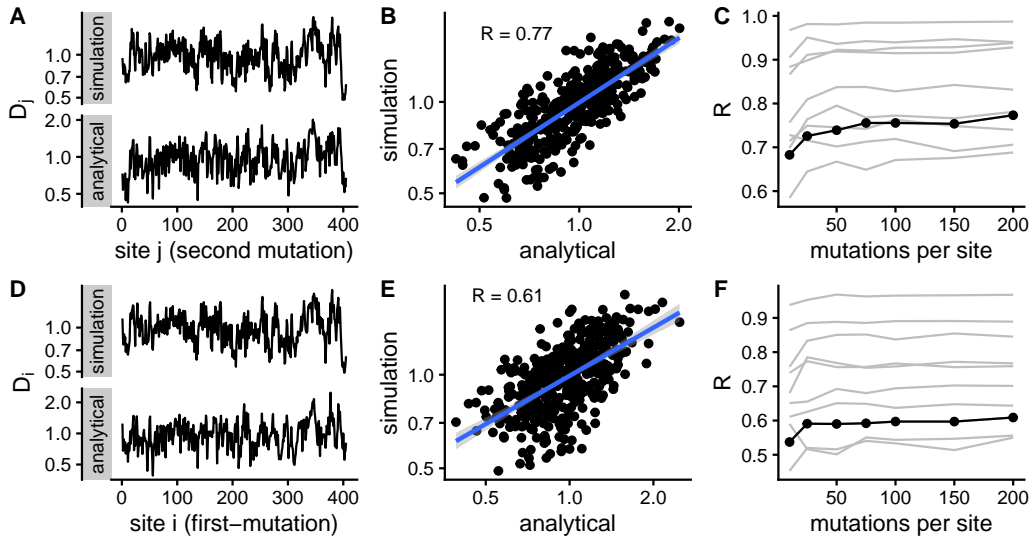

Supplement: suppl.pdf [file suppl.pdf]
